# Supplementary material
Source: Research Square preprint supplement (doi:10.21203/rs.3.rs-10170559/v1)
Supplement: Supplementary file 1 [file 1bedef9bd73a23ae525d7a61.docx]

**Table 9.** Characterization of Sample size ranges, typical/median values, and notes by study category.

| **Category** | **Range** | **Typical / Median** | **Notes** |
| --- | --- | --- | --- |
| Algorithm Development Studies | 1,000 – 18,000+ images | Large datasets | Often used public datasets (Kaggle, Figshare, BraTS) |
| Clinical / Retrospective Studies | 3 – 18,149 patients | 50–400 patients | Wide variation |
| Prospective Clinical Trials | 5 – 68 patients | Small to medium | Mostly DBS-related trials |
| Case Series / Reports | 1 – 5 cases | Very small | Limited generalizability |
