# Supplementary material
Source: Research Square preprint supplement (doi:10.21203/rs.3.rs-10170559/v1)
Supplement: Supplementary file 2 [file 3960176d2a44c9a3e35773f5.docx]

**Table 4.** Distribution of the 56 studies by domain in five different technology and clinical application domains.

| **Domain** | **Number of Studies** | **Percentage** |
| --- | --- | --- |
| Deep Learning for Brain Tumor Detection & Classification | 11 | 19.6% |
| Machine Learning for Clinical Outcome Prediction | 10 | 17.9% |
| Robotic SEEG / Stereotactic Procedures | 8 | 14.3% |
| Deep Brain Stimulation Innovations & Adaptive Systems | 8 | 14.3% |
| Other Technical / Algorithmic Studies | 19 | 33.9% |
| **Total** | **56** | **100%** |
