# Supplementary material
Source: Research Square preprint supplement (doi:10.21203/rs.3.rs-10170559/v1)
Supplement: Supplementary file 3 [file 39fcc9d8a4e6718350cd0df1.docx]

**Table 5.** Year-wise distribution of included studies with number, percentage, cumulative percentage, and key emerging topics.

| **Year of Publication** | **Number of Studies** | **Percentage** | **Cumulative %** | **Key Topics Emerging in that Year** |
| --- | --- | --- | --- | --- |
| 2015 | 1 | 1.8% | 1.8% | Robotic keyhole neurosurgery |
| 2016 | 1 | 1.8% | 3.6% | NLP for epilepsy surgery candidacy |
| 2017 | 1 | 1.8% | 5.4% | Haptic teleoperation |
| 2018 | 3 | 5.4% | 10.7% | Robot-assisted SEEG, RNS |
| 2020 | 6 | 10.7% | 21.4% | DBS, Robotic SEEG, DL implants |
| 2021 | 7 | 12.5% | 33.9% | ML prediction, Frameless DBS, SCC DBS biomarkers |
| 2022 | 8 | 14.3% | 48.2% | DL tumor detection, Awake craniotomy monitoring, aSAH prediction |
| 2023 | 7 | 12.5% | 60.7% | Craniotomy simulation, UIA outcome ML, DBS programming |
| 2024 | 9 | 16.1% | 76.8% | DL tumor classification, Adaptive DBS trial, IoT DL |
| 2025 | 11 | 19.6% | 96.4% | GBM EOR AI, aDBS, TLE biomarker, IoT DL, Ensemble DL |
| 2026 | 2 | 3.6% | 100% | Multi-scale CNN-SVM, Long-term aDBS |
| **Total** | **56** | **100%** | — | — |
