# Supplementary material
Source: Research Square preprint supplement (doi:10.21203/rs.3.rs-10170559/v1)
Supplement: Supplementary file 4 [file 3bdfe908b747e5acfa280f30.docx]

**Table 11.** Ranked list of top deep learning models for brain tumor detection with accuracy, validation type, and notes.

| **Rank** | **Study (Citation)** | **Model** | **Accuracy** | **Validation Type** | **Notes** |
| --- | --- | --- | --- | --- | --- |
| 1 | Ishfaq et al.29 (2025) | EfficientNet-B4 | **99.7%** | Internal + Unseen test | Best on unseen data |
| 2 | Ullah et al.24 (2024) | VGG + Custom CNN | **99.24%** | Internal | Very high performance |
| 3 | Rasool et al.25 (2025) | CNN-TumorNet | **99%** | Internal | Multi-class |
| 4 | Agarwal et al.28 (2024) | Modified Inception V3 | **98.89%** | Internal + Simulation | Benign vs Malignant |
| 5 | Asif et al.33 (2025) | InceptionV3 + Xception Ensemble | **98.30%** | Internal | Ensemble benefit |
| 6 | Ben Brahim et al.27 (2024) | VGG16 | **98%** | Internal | Balanced metrics |
| 7 | Ke et al.31 (2026) | MCACNN-SVM | **96.9%** | Internal | Good with fewer parameters |
| 8 | Srinivas et al.32 (2025) | 4-conv Explainable CNN | **95.86%** | Internal | Explainable AI focus |
