# Supplementary material
Source: Research Square preprint supplement (doi:10.21203/rs.3.rs-10170559/v1)
Supplement: Supplementary file 5 [file 442516d020ea6204cb62c01c.docx]

**Table S3.** Expanded numerical results of deep brain stimulation investigations, comprising UPDRS motor benefit, therapeutic window comparisons among conventional versus directional leads, energy savings achieved with adaptive DBS, and response rate of quality of life improvements.

| **Study (Citation)** | **Key Metric** | **Value** | **Notes** |
| --- | --- | --- | --- |
| Piano et al. (2021) | UPDRS III improvement (1 year, off-med) | **30.1%** | Sustained benefit observed at 3 years |
| Chen et al. (2021) | UPDRS improvement | Significant (47.2 → 20.3) | Combined with AI-processed MRI |
| Shao et al. (2020) | Therapeutic Window (New vs Legacy) | Significantly larger | p = 0.005 (PD), p = 0.035 (ET) |
| Bronte-Stewart et al. (2025) | Reduction in Total Electrical Energy Delivered | **~22 µW** | Adaptive DBS vs continuous DBS |
| Ferrea et al. (2024) | Patients with improved quality of life | **~54%** | Electrode position was a key predictor |
