# Supplementary material
Source: Research Square preprint supplement (doi:10.21203/rs.3.rs-10170559/v1)
Supplement: Supplementary file 6 [file 481ade188d7efcc8b5cea7e2.docx]

**Table 1.** Inclusion and exclusion criteria applied as per the predefined protocol for studies on AI/ML/DL/robotics/advanced technologies in neurosurgery with quantitative outcomes.

| **Criteria** | **Description** |
| --- | --- |
| **Inclusion Criteria** | 1. Studies focusing on artificial intelligence (AI), machine learning (ML), deep learning (DL), robotics, or advanced technologies in neurosurgery 2. Studies reporting quantitative outcomes (accuracy, AUC, error in mm, clinical scores, complication rates, etc.) 3. Original research articles including algorithm development, retrospective, prospective, experimental, and case series studies 4. Studies published in English 5. Studies involving human subjects, cadavers, or simulation models relevant to neurosurgical applications |
| **Exclusion Criteria** | 1. Studies not related to neurosurgery (e.g., general radiology or non-neurosurgical robotics) 2. Review articles, editorials, letters, or conference abstracts without original data 3. Studies without any quantitative/numerical outcomes 4. Animal studies (except where directly relevant to human neurosurgical applications) 5. Studies with insufficient methodological detail to assess risk of bias or extract data 6. Duplicate publications or overlapping datasets |
