# Supplementary material
Source: Research Square preprint supplement (doi:10.21203/rs.3.rs-10170559/v1)
Supplement: Supplementary file 7 [file 4a3f6d3624afb3766e525d85.docx]

**Table 21.** Summary of Clinical and Technical Outcomes within Included Studies, Including Improvement in DBS Motor Function, Seizure Freedom Rates, Reduction in Documentation Time, Increase in Therapeutic Window, and Probability of Optimal Contact Identification.

| **Metric** | **Value** | **Studies** | **Notes** |
| --- | --- | --- | --- |
| UPDRS Improvement (DBS) | **30.1%** at 1 year | Piano et al. | Sustained at 3 years |
| Seizure Freedom (selected) | 48–90% | Multiple | Variable by pathology |
| Documentation Time | **2.3–4.6 min** (ChatGPT) vs 15–21 min | Dubinski et al. | Large time saving |
| Therapeutic Window | Significantly larger (new directional leads) | Shao et al. | p=0.005 in PD |
| Probability of Optimal Contact | **~90%** | Shah et al. | With algorithm |
