# Supplementary material
Source: Research Square preprint supplement (doi:10.21203/rs.3.rs-10170559/v1)
Supplement: Supplementary file 8 [file 72e207e254f7a47a80020939.docx]

**Table 6.** Distribution of study designs among the 56 selected studies, grouped according to study design with numbers, percentages, and examples of topics in each group.

| **Study Design** | **Number of Studies** | **Percentage** | **Examples of Topics** |
| --- | --- | --- | --- |
| Algorithm Development | 18 | 32.1% | DL for tumor detection, ML prediction models |
| Retrospective Observational / Cohort | 17 | 30.4% | Outcome prediction, Robotic SEEG, DBS outcomes |
| Prospective Clinical / Trial | 7 | 12.5% | Adaptive DBS, SCC DBS biomarkers, Thalamic DBS |
| Case Series / Case Report | 5 | 8.9% | Robotic applications, MRgLITT |
| Experimental / Simulator / Cadaver | 5 | 8.9% | Craniotomy simulation, Haptic teleoperation |
| Comparative / Methodological | 4 | 7.1% | Robot vs Manual SEEG, NLP documentation |
| **Total** | **56** | **100%** | — |
