# Supplementary material
Source: Research Square preprint supplement (doi:10.21203/rs.3.rs-10170559/v1)
Supplement: Supplementary file 9 [file 75a019ca6489bb5577e65e33.docx]

**Table S1.** Detailed categorization of all 56 included studies according to their study design, sample size, type of technology/model used, validation type, important numerical outcome(s), and major findings/significance arranged into thematic domains.

| **Classification** | **Study (Citation)** | **Design & Sample** | **Technology / Model** | **Validation Type** | **Key Numerical Results** | **Main Finding & Significance** |
| --- | --- | --- | --- | --- | --- | --- |
| Awake Craniotomy Monitoring | Umaba et al.18 (2022) | Prospective observational n=23 (mean age 49.6 ± 17.4 yrs) | Intraoperative hand strength + BIS + JCS + Propofol Cp | Prospective clinical | Hand strength (unaffected): 55.0±24.7% → 84.4±12.2% (τ=−0.51)  Affected: 37.9±34.2% → 89.4±19.5% (τ=−0.35)  AUC: Hand strength 0.76, BIS 0.66, Propofol Cp 0.78 75% cutoff: Sens 0.76, Spec 0.67 | Hand strength is a sensitive real-time indicator of intraoperative awareness during awake craniotomy |
| Aneurysm Clipping & Nursing | Xu et al.19 (2022) | Randomized controlled clinical study Exp n=45, Ctrl n=40 | ICGA + OTSU method vs conventional nursing | Prospective clinical (RCT) | Op time: 180.3±29.2 vs 173.9±30.3 min (p>0.05)  Blood loss: 234.4±86.4 vs 256.4±64.7 mL (p>0.05) SE 0.47, SSIM 0.84, MSE 3.71 | OTSU-ICGA improves nursing process and quality of life (p<0.05) |
| Craniotomy Simulation Training | Singh et al.20 (2023) | Experimental study n=22 neurosurgeons | CT-based 3D-printed craniotomy simulator + FMG + ML | Experimental (simulator-based) | Classifier accuracy:  Bayes 90.0±14.8%, LDA 81.9±23.6%, SVM 76.7±32.9%, DT 86.22±20.8% Haptic score: 7.1 | Simulator with FMG+ML provides objective and realistic surgical skill assessment |
| **Theme** | **Study (Citation)** | **Design & Sample** | **Technology / Model** | **Validation Type** | **Key Numerical Results** | **Main Finding & Significance** |
| Brain Shift Prediction | Shimamoto et al.10 (2023) | Retrospective observational n=248 | W-Net DL for brain shift compensation | Retrospective clinical | TRE at Tumor Center: 4.14 → 2.31 mm  TRE at Maximum Shift Position: 9.61 → 3.71 mm | CNN effectively compensates brain shift after dural opening (p<0.0001) |
| Intraoperative MRI Reconstruction | Ottesen et al.11 (2025) | Retrospective n=40 | DL model vs Compressed Sense (CS) | Retrospective clinical | DL significantly superior to CS in spatial resolution, anatomic conspicuity, SNR, and contrast (Likert scores) | DL reconstruction improves intraoperative MRI image quality |
| Robotic Keyhole Neurosurgery | Marcus et al.21 (2015) | Cadaver study | da Vinci robotic platform | Cadaveric | 5mm instruments performed better than 8mm instruments and 12mm endoscope in keyhole approaches | da Vinci system has limited feasibility and safety for keyhole neurosurgery |
| Robotic Digital Microscope | Piloni et al.22 (2021) | Preliminary clinical experience n=3 | RoboticScope (RS) with head-mounted display | Clinical case series | No intra- or postoperative complications Hands-free workflow achieved | RoboticScope provides safe, comfortable, and high-resolution 3D visualization |
| Haptic Teleoperation Single-Port Surgery | Seung et al.23 (2017) | Experimental (trajectory + tissue removal) | SIROMAN haptic-guided teleoperation system | Experimental (simulated surgery) | Trajectory error: 1.19 ± 0.72 mm (with haptic) vs 1.87 ± 1.29 mm (without) Tissue removal error reduced by ~21% (p<0.05) | Haptic guidance significantly improves precision and safety in single-port brain tumor removal |
| **Theme** | **Study (Citation)** | **Design & Sample** | **Technology / Model** | **Validation Type** | **Key Numerical Results** | **Main Finding & Significance** |
| DL Brain Tumor Detection | Ullah et al.24 (2024) | Algorithm development + validation n=4600 MRI | Custom CNN + VGG Transfer Learning | Internal validation | Accuracy 99.24%; Sensitivity, Specificity, Precision, F1-score ≈ 99% | VGG-based models show high performance for brain tumor detection on MRI |
| DL Brain Tumor Classification | Rasool et al.25 (2025) | Algorithm development n=7023 MRI | CNN-TumorNet + LIME | Internal validation | Accuracy 99% in differentiating tumor vs non-tumor | CNN-TumorNet with explainability achieves excellent classification performance |
| ANN for GBM Resectability | Marcus et al.26 (2020) | Retrospective n=135 supratentorial GBM | Artificial Neural Network vs conventional grading | Retrospective clinical | ANN: AUC 0.87, Accuracy 83% Conventional: AUC 0.79, Accuracy 80% | ANN significantly improves prediction of surgical resectability in GBM (p<0.01) |
| DL Brain Tumor Detection (VGG16) | Ben Brahim et al.27 (2024) | Algorithm development n=3000 MRI | VGG16 + data augmentation + Adam optimizer | Internal validation | Accuracy 98%; F1-score 98.06%; Precision 98.7% | VGG16-based CNN with augmentation achieves high accuracy in tumor detection |
| Hybrid DL Brain Tumor System | Agarwal et al.28 (2024) | Algorithm development + experiments | ODTWCHE preprocessing + modified Inception V3 | Internal + simulation-based | Accuracy 98.89%; Benign sensitivity 96.89%, Malignant sensitivity 97.45% | Two-phase hybrid system provides robust benign vs malignant classification |
| IoT DL Brain Tumor Classification | Ishfaq et al.29 (2025) | Algorithm development + deployment test | EfficientNet-B4, Inception-v4, Custom CNN | Internal + unseen test set | Test accuracy up to 99.7% (EfficientNet-B4) | Smart IoT-enabled DL pipeline maintains high performance on unseen data |
| **Theme** | **Study (Citation)** | **Design & Sample** | **Technology / Model** | **Validation Type** | **Key Numerical Results** | **Main Finding & Significance** |
| Postoperative GBM Segmentation | Cepeda et al.30 (2024) | Model development + external validation | nnU-Net (best) | External validation + Independent cohort | Dice scores: Enhancing tumor 0.81, Edema 0.77 EOR classification accuracy up to 96% | nnU-Net model shows strong performance and generalizability for post-op GBM segmentation |
| Multi-scale CNN-SVM Tumor Classification | Ke et al.31 (2026) | Algorithm development n=7023 T1-CE MRI | MCACNN-SVM | Internal validation | Accuracy 96.9%; All per-class AUC > 0.99 | MCACNN-SVM achieves strong performance with relatively few parameters (1.75M) |
| Explainable DL Brain Tumor Framework | Srinivas et al.32 (2025) | Algorithm development | 4-conv CNN + Grad-CAM/LIME | Internal validation | Test accuracy 95.86%; Validation accuracy 92.76% | Lightweight explainable CNN achieves high accuracy with reliable localization |
| Ensemble DL Brain Tumor Detection | Asif et al.33 (2025) | Algorithm development | InceptionV3 + Xception ensemble | Internal validation | Validation accuracy 98.30% | Ensemble approach significantly improves brain tumor detection performance |
| Vision Transformer Survival Prediction | Lin et al.34 (2025) | Algorithm development n=118 GBM patients | 3D Vision Transformer (ViT) | Internal validation (train/test split) | Test accuracy 62.5% (ranked 2nd among 14 methods) | ViT can predict GBM overall survival directly from MRI without tumor segmentation |
| ML Surgical Path Planning | Dundar et al.35 (2022) | Retrospective + algorithmic n=1 patient | Q-learning + new heuristic algorithm | Algorithmic / Simulation | Best path obtained from 16×16 dimension after evaluating millions of points | AI can generate nonlinear optimal surgical paths while avoiding critical brain structures |
| **Theme** | **Study (Citation)** | **Design & Sample** | **Technology / Model** | **Validation Type** | **Key Numerical Results** | **Main Finding & Significance** |
| ML Remission Prediction (Cushing’s) | Zhang et al.36 (2021) | Retrospective n=1025 CD patients | Stacking ensemble ML | Retrospective clinical | Best model: AUC 0.743, Accuracy 0.746 | ML model can preoperatively predict immediate remission after TSS |
| ML Outcome Prediction (UIA Clipping) | Stroh et al.37 (2023) | Retrospective observational n=466 | Multiple ML models (QDA best) | Retrospective clinical (internal + external validation attempted) | QDA AUC for mRS >2: 0.70; Permanent neurological deficit: 0.71 | ML models (especially QDA) predict clinical outcomes after UIA clipping better than logistic regression internally |
| ML Prediction of DCI after aSAH | Hu et al.38 (2022) | Multicentric observational cohort n=404 | RF, ANN, LR (RF & ANN best) | Retrospective clinical | RF & ANN: AUC 0.858 (superior to LR) | RF model with online nomogram can reliably predict delayed cerebral ischemia |
| ML Outcome Prediction aSAH | Dengler et al.39 (2021) | Retrospective n=388 | Multiple ML + clinico-radiological features | Retrospective clinical | Max AUC 0.78 (comparable to best clinical score GCS) | ML performance is comparable to established clinical scoring systems |
| BPNN Prognosis Brain Contusion | Li et al.40 (2022) | Retrospective n=136 | Back-propagation Neural Network (BPNN) | Retrospective clinical | BPNN AUC 0.816–0.819 | BPNN model demonstrates good discrimination for predicting poor prognosis |
| ML Seizure Outcome (Peri-ictal EEG) | Sheikh et al.12 (2024) | Retrospective clinical n=294 | LGBM + peri-ictal scalp EEG features | Retrospective clinical | LGBM mean accuracy 94.5%; Out-of-group accuracy 91.9% | Peri-ictal EEG combined with clinical variables enables highly accurate prediction of surgical outcome |
| **Theme** | **Study (Citation)** | **Design & Sample** | **Technology / Model** | **Validation Type** | **Key Numerical Results** | **Main Finding & Significance** |
| GNN + Hybrid iEEG for Epilepsy Surgery | Sun et al.41 (2024) | Retrospective | Genetic Neural Network + hybrid SOZ marker | Retrospective (open dataset) | Hybrid GNN accuracy improved to 94.30% (from baseline ~75%) | Hybrid iEEG marker + GNN significantly enhances epilepsy surgery outcome prediction |
| Explainable AI for GBM EOR | Kernbach et al.14 (2025) | Multicenter model development + external validation | Random Forest + SHAP | External validation + Prospective clinical testing | Human + AI accuracy reached 0.94 (vs AI alone 0.73, expert 0.53) | Human-AI collaboration with explainable AI clearly outperforms either alone |
| ML Poor Outcome aSAH | Jabal et al.42 (2025) | Retrospective (NIS database) n=18,149 | Multilayer Perceptron + SHAP | Retrospective (large database) | AUC 0.80, Accuracy 73%, F1-score 0.75 | Interpretable ML can predict poor short-term outcomes after aSAH |
| ML DCI Prediction (Inflammatory Markers) | Liu et al.43 (2025) | Retrospective cohort n=562 | Neural Network (best) | Retrospective clinical (train/test split) | Train AUC 0.826; Test AUC 0.808 | Neural network integrating clinical grades and inflammatory markers reliably predicts DCI |
| Hyperbolic Biomarker TLE Surgery | Guillemaud et al.44 (2025) | Observational n=51 ATLR patients | Hyperbolic Displacement (HypDisp) biomarker | Retrospective clinical | Overall AUC 0.87, Balanced accuracy 0.81 | HypDisp biomarker from brain networks can predict seizure outcome after temporal lobe epilepsy surgery |
| Robotic SEEG Pediatric Epilepsy | Nelson et al.45 (2020) | Single-center experience n=19 children, 148 electrodes | ROSA robotic stereotactic assistance | Clinical experience / Prospective data collection | 148 electrodes placed successfully with 0 perioperative complications | ROSA is safe, accurate, and efficient for pediatric SEEG implantation |
| **Theme** | **Study (Citation)** | **Design & Sample** | **Technology / Model** | **Validation Type** | **Key Numerical Results** | **Main Finding & Significance** |
| Robot-assisted SEEG Children | McGovern et al.46 (2018) | Single-center retrospective n=57 children | ROSA robot-assisted SEEG | Retrospective clinical | 50% achieved Engel I outcome; 76% seizure-free at 1 month | Robot-assisted SEEG is safe and helps a significant proportion of children achieve seizure freedom |
| Robot vs Manual SEEG | Kim et al.47 (2020) | Retrospective comparative n=50 | ROSA robot-assisted vs navigated SEEG | Retrospective clinical comparison | Robot operative time significantly shorter (p=0.02); Equivalent EZ localization rate | Robotic assistance improves efficiency without compromising safety or accuracy |
| Frameless Robot SEEG in HH | Li et al.48 (2023) | Retrospective n=28 patients, 161 electrodes | Frameless robot-assisted SEEG + RFA | Retrospective clinical | Median target error 2.74 mm; Seizure freedom rate 90%; Major complication rate 6.7% | Frameless robot-assisted SEEG is accurate, safe, and effective for pediatric hypothalamic hamartoma |
| Robot-assisted SEEG + Navigation (Case) | Luo et al.49 (2024) | Case report n=1 | Huake robot + SEEG + frameless stereotaxy | Case report | Excellent cognitive outcomes (MOCA 28, MMSE 29); Seizure-free at 2 years follow-up | Integrated robotic + SEEG approach enabled precise removal with excellent functional outcome |
| Robotic RNS in Bitemporal Epilepsy | Rohatgi et al.50 (2018) | Technical note + case series n=5 | ROSA-guided bilateral hippocampal RNS | Clinical case series | 4/5 patients had clinical benefit; New lateralizing data obtained in 3/5 cases | Robotic guidance enables safe and effective RNS implantation in bitemporal epilepsy |
| **Theme** | **Study (Citation)** | **Design & Sample** | **Technology / Model** | **Validation Type** | **Key Numerical Results** | **Main Finding & Significance** |
| Robot-assisted MRgLITT | Gupta et al.51 (2020) | Case study n=1 | ROSA + MRI-guided Laser Interstitial Thermal Therapy | Case report | Seizure-free by 12 months (temporary facial weakness resolved by 6 months) | Robot-assisted MRgLITT can be an effective minimally invasive alternative in selected cases |
| Repeat SRT in Hypothalamic Hamartoma | Shirozu et al.52 (2020) | Retrospective cohort n=150 | Repeat stereotactic radiofrequency thermocoagulation | Retrospective clinical | 1st SRT GS freedom 68.7%; 2nd SRT 67.5%; Higher persistent complications with re-SRT | Repeat SRT offers benefit for recurrent seizures but carries higher long-term complication risk |
| NLP for Pediatric Epilepsy Surgery Candidacy | Cohen et al.53 (2016) | Methodological study | NLP + SVM/Naive Bayes | Retrospective (chart review) | Best F-measure 0.82 | NLP combined with ML can help identify pediatric epilepsy surgery candidates from clinical notes |
| Frameless STN-DBS | Piano et al.54 (2021) | Retrospective observational n=18 PD patients | Frameless stereotaxy for bilateral STN-DBS | Retrospective clinical | 1-year motor improvement 30.1%; LEDD reduction 31.2%; Benefits sustained at 3 years | Frameless bilateral STN-DBS is safe and clinically effective up to 3 years |
| fMRI + ML for DBS Parameter Optimization | Boutet et al.55 (2021) | Interventional + ML validation n=67 PD patients | fMRI brain patterns + Linear Discriminant Analysis | Prospective + ML validation | ML accuracy for optimal settings: 88% (a priori), 76% (stimulation-naïve) | fMRI combined with ML can serve as an objective biomarker to predict optimal DBS settings |
| New-generation Directional DBS | Shao et al.56 (2020) | Retrospective observational n=28 | New-generation directional DBS leads | Retrospective clinical | Therapeutic window significantly larger with new system (PD: p=0.005; ET: p=0.035) | New directional DBS systems provide wider therapeutic windows compared to legacy leads |
| **Theme** | **Study (Citation)** | **Design & Sample** | **Technology / Model** | **Validation Type** | **Key Numerical Results** | **Main Finding & Significance** |
| Robotic DBS Lead Implantation | Faraji et al.57 (2020) | Retrospective observational n=20 | ROSA robotic-assisted stereotaxy (awake) | Retrospective clinical | Overall radial error 1.14 ± 0.11 mm (improved to 0.86 mm after learning curve, p=0.006) | Robotic assistance reduces placement error with surgeon experience in awake DBS |
| Multimodal Biomarker DBS Programming | Shah et al.58 (2023) | Prospective observational + algorithmic n=17 PD | LFP features + Lasso + algorithmic selection | Prospective clinical | ~90% probability of identifying optimal contact using full lead data | Combining LFP biomarkers with algorithmic selection can greatly improve DBS programming efficiency |
| Long-term Adaptive DBS (aDBS) | Bronte-Stewart et al.59 (2025) | Nonrandomized clinical trial n=68 PD patients | Adaptive DBS (DT-aDBS & ST-aDBS modes) | Prospective clinical trial | DT-aDBS: 91–95% met primary endpoint; Significant reduction in total electrical energy delivered | Long-term adaptive DBS is tolerable, effective, and more energy-efficient than continuous DBS |
| ML for DBS QoL Response | Ferrea et al.60 (2024) | Observational cohort n=63 PD patients | Explainable ML on multimodal data | Retrospective + prospective elements | ~54% of patients showed QoL improvement; Electrode position and beta activity were key predictors | Data-driven approaches can help identify factors influencing quality of life response to DBS |
| AI-enhanced MRI in STN-DBS | Chen et al.61 (2021) | Comparative study n=40 PD patients | STN-DBS + AI-processed MRI | Clinical comparative | Significant improvement in UPDRS, MMSE, and MoCA scores; Lower rates of dyskinesia and motor fluctuations | STN-DBS combined with AI-enhanced MRI improves clinical outcomes and helps detect neuropsychiatric changes |
| Thalamic DBS for Acquired Dystonia | San Luciano et al.62 (2021) | Phase 1 clinical trial n=5 young patients | Bilateral Vim/Vop thalamic DBS | Prospective clinical trial (Phase 1) | BFMDRS motor improvement +21.5%; PedsQL improvement +27%; No major adverse events | Bilateral thalamic DBS is feasible and shows promising early efficacy in acquired dystonia |
| **Theme** | **Study (Citation)** | **Design & Sample** | **Technology / Model** | **Validation Type** | **Key Numerical Results** | **Main Finding & Significance** |
| Lesion Network for Tics & DBS | Ganos et al.63 (2022) | Lesion mapping + DBS cohort analysis | Lesion network mapping + connectivity analysis | Retrospective (lesion + DBS cohorts) | Connectivity strength correlated with tic improvement (R = 0.45–0.54) | Tic-inducing brain lesions map to a consistent network; network-guided DBS may optimize outcomes |
| DBS for Pain in Childhood Dystonia | Perides et al.64 (2020) | Retrospective cohort n=140 children | DBS (various targets) | Retrospective clinical | 90% improved dystonic pain; Significant improvement in NPRS and CPCHILD scores | DBS effectively reduces dystonic pain and improves quality of life in children |
| Implantable Percept PC DBS Device | Goyal et al.65 (2021) | Observational validation n=15 | Percept PC (chronic LFP recording + stimulation) | Clinical validation | Significant difference in beta power between dyskinetic and good states (p=0.04) | Percept PC enables chronic electrophysiological biomarker tracking for personalized adaptive DBS |
| SCC DBS Biomarkers in Depression | Alagapan et al.66 (2023) | Interventional prospective n=10 TRD patients | Subcallosal cingulate DBS + LFP biomarkers | Prospective clinical | HDRS reduced from 22.3 to 7.3; Biomarker AUC 0.94; 70% remission rate | LFP biomarkers can objectively track recovery and guide stimulation adjustments in TRD |
| DBS in Treatment-Resistant Schizophrenia | Corripio et al.67 (2020) | Pilot RCT crossover n=8 | Subgenual ACC or NAcc DBS | Pilot RCT (crossover) | Improvement in negative symptoms (SANS) and functioning (GAF, PSP) | DBS shows therapeutic potential in treatment-resistant schizophrenia |
| DL Cranial Implant Design | Wu et al.68 (2022) | Framework development + clinical test | 3D V-Net/U-Net style autoencoder | Algorithmic + clinical test case | Volumetric error < 8.2%; Successfully generated implant for real asymmetric skull defect | Deep learning framework enables accurate patient-specific cranial implant design with minimal post-processing |
| ChatGPT vs Speech Recognition for Documentation | Dubinski et al.69 (2024) | Retrospective observational | ChatGPT vs SpeaKING software | Retrospective comparison | ChatGPT significantly faster (2.3–4.6 min vs 15–21 min); Factual accuracy 71–85% | ChatGPT can dramatically reduce time required for operative reports and discharge summaries |
