# Supplementary material
Source: Research Square preprint supplement (doi:10.21203/rs.3.rs-10170559/v1)
Supplement: Supplementary file 10 [file 78957715eb40bc6728387c17.docx]

**Table S2.** Comprehensive assessment of the risk of bias in all 56 included studies for each domain separately with scores for all five domains, overall risk of bias and reason for assessment.

| **Study (Citation)** | **Domain** | **Study Design** | **Data Source & Selection** | **Validation Method** | **Overfitting / Data Leakage Risk** | **Outcome Measurement** | **Reporting Quality** | **Overall Risk of Bias** | **Main Reason for Judgment** |
| --- | --- | --- | --- | --- | --- | --- | --- | --- | --- |
| Umaba et al. (2022) | Awake Craniotomy Monitoring | Prospective observational | Low | Prospective clinical | Low | Low | Good | **Low** | Prospective design with clear outcomes |
| Xu et al. (2022) | Aneurysm Clipping & Nursing | Randomized controlled trial | Low | Prospective (RCT) | Low | Low | Good | **Low** | Randomized controlled design |
| Singh et al. (2023) | Craniotomy Simulation Training | Experimental study | Moderate | Simulator-based | Moderate | Moderate | Good | **Moderate** | Simulator-based, not real-patient outcomes |
| Shimamoto et al. (2023) | Brain Shift Prediction | Retrospective observational | Moderate | Retrospective clinical | Moderate | Low | Good | **Moderate** | Retrospective single-center design |
| Ottesen et al. (2025) | Intraoperative MRI Reconstruction | Retrospective | Moderate | Retrospective clinical | Moderate | Low | Good | **Moderate** | Retrospective design |
| Marcus et al. (2015) | Robotic Keyhole Neurosurgery | Cadaver study | Moderate | Cadaveric | Moderate | Moderate | Moderate | **Moderate** | Cadaver-based feasibility study |
| **Study (Citation)** | **Domain** | **Study Design** | **Data Source & Selection** | **Validation Method** | **Overfitting / Data Leakage Risk** | **Outcome Measurement** | **Reporting Quality** | **Overall Risk of Bias** | **Main Reason for Judgment** |
| Piloni et al. (2021) | Robotic Digital Microscope | Case series | Moderate | Clinical case series | Moderate | Low | Moderate | **Moderate** | Very small sample size (n=3) |
| Seung et al. (2017) | Haptic Teleoperation Single-Port Surgery | Experimental | Moderate | Simulated surgery | Moderate | Moderate | Good | **Moderate** | Experimental/simulation-based |
| Ullah et al. (2024) | Deep Learning Brain Tumor Detection | Algorithm development | Moderate | Internal validation only | **High** | Low | Moderate | **High** | Internal validation only; high overfitting risk |
| Rasool et al. (2025) | Deep Learning Brain Tumor Classification | Algorithm development | Moderate | Internal validation only | **High** | Low | Moderate | **High** | Internal validation only |
| Marcus et al. (2020) | ANN for GBM Resectability | Retrospective | Moderate | Retrospective clinical | Moderate | Low | Good | **Moderate** | Retrospective design |
| Ben Brahim et al. (2024) | Deep Learning Tumor Detection (VGG16) | Algorithm development | Moderate | Internal validation only | **High** | Low | Good | **High** | Internal validation only |
| Agarwal et al. (2024) | Hybrid DL Brain Tumor System | Algorithm development | Moderate | Internal + Simulation | Moderate | Low | Good | **Moderate** | Simulation-based validation used |
| **Study (Citation)** | **Domain** | **Study Design** | **Data Source & Selection** | **Validation Method** | **Overfitting / Data Leakage Risk** | **Outcome Measurement** | **Reporting Quality** | **Overall Risk of Bias** | **Main Reason for Judgment** |
| Ishfaq et al. (2025) | IoT DL Brain Tumor Classification | Algorithm development | Moderate | Internal + Unseen test set | Moderate | Low | Good | **Moderate** | Included unseen test set |
| Cepeda et al. (2024) | Postoperative GBM Segmentation | Model development + validation | Low | External + Independent cohort | Low | Low | Good | **Low** | External validation performed |
| Ke et al. (2026) | Multi-scale CNN-SVM Tumor Classification | Algorithm development | Moderate | Internal validation only | **High** | Low | Good | **High** | Internal validation only |
| Srinivas et al. (2025) | Explainable DL Brain Tumor Framework | Algorithm development | Moderate | Internal validation only | **High** | Low | Good | **High** | Internal validation only |
| Asif et al. (2025) | Ensemble DL Brain Tumor Detection | Algorithm development | Moderate | Internal validation only | **High** | Low | Moderate | **High** | Internal validation only |
| Lin et al. (2025) | Vision Transformer Survival Prediction | Algorithm development | Moderate | Internal validation only | **High** | Moderate | Moderate | **High** | Small sample size + internal validation |
| **Study (Citation)** | **Domain** | **Study Design** | **Data Source & Selection** | **Validation Method** | **Overfitting / Data Leakage Risk** | **Outcome Measurement** | **Reporting Quality** | **Overall Risk of Bias** | **Main Reason for Judgment** |
| Dundar et al. (2022) | ML Surgical Path Planning | Algorithmic + Retrospective | Moderate | Algorithmic/Simulation | High | Moderate | Moderate | **High** | Primarily algorithmic with limited clinical validation |
| Zhang et al. (2021) | ML Remission Prediction (Cushing’s) | Retrospective | Moderate | Retrospective clinical | Moderate | Low | Good | **Moderate** | Retrospective design |
| Stroh et al. (2023) | ML Outcome Prediction (UIA Clipping) | Retrospective observational | Moderate | Retrospective | Moderate | Low | Good | **Moderate** | Retrospective design |
| Hu et al. (2022) | ML Prediction of DCI after aSAH | Multicentric retrospective | Low | Retrospective clinical | Moderate | Low | Good | **Moderate** | Multicentric but retrospective |
| Dengler et al. (2021) | ML Outcome Prediction aSAH | Retrospective | Moderate | Retrospective clinical | Moderate | Low | Good | **Moderate** | Retrospective design |
| Li et al. (2022) | BPNN Prognosis Brain Contusion | Retrospective | Moderate | Retrospective clinical | Moderate | Low | Moderate | **Moderate** | Retrospective design |
| Sheikh et al. (2024) | ML Seizure Outcome (Peri-ictal EEG) | Retrospective clinical | Moderate | Retrospective clinical | Moderate | Low | Good | **Moderate** | Retrospective design |
| **Study (Citation)** | **Domain** | **Study Design** | **Data Source & Selection** | **Validation Method** | **Overfitting / Data Leakage Risk** | **Outcome Measurement** | **Reporting Quality** | **Overall Risk of Bias** | **Main Reason for Judgment** |
| Sun et al. (2024) | GNN + Hybrid iEEG for Epilepsy Surgery | Retrospective | Moderate | Retrospective (open dataset) | Moderate | Low | Good | **Moderate** | Retrospective design |
| Kernbach et al. (2025) | Explainable AI for GBM EOR | Multicenter model development + validation | Low | External validation + Prospective testing | Low | Low | Good | **Low** | External validation and prospective component |
| Jabal et al. (2025) | ML Poor Outcome aSAH | Large retrospective database | Low | Large database analysis | Moderate | Low | Good | **Moderate** | Large sample size but retrospective |
| Liu et al. (2025) | ML DCI Prediction (Inflammatory Markers) | Retrospective cohort | Moderate | Retrospective (train/test split) | Moderate | Low | Good | **Moderate** | Retrospective design |
| Guillemaud et al. (2025) | Hyperbolic Biomarker TLE Surgery | Observational | Moderate | Retrospective clinical | Moderate | Low | Good | **Moderate** | Retrospective design |
| Nelson et al. (2020) | Robotic SEEG Pediatric Epilepsy | Single-center experience | Moderate | Clinical data collection | Moderate | Low | Good | **Moderate** | Single-center experience study |
| **Study (Citation)** | **Domain** | **Study Design** | **Data Source & Selection** | **Validation Method** | **Overfitting / Data Leakage Risk** | **Outcome Measurement** | **Reporting Quality** | **Overall Risk of Bias** | **Main Reason for Judgment** |
| McGovern et al. (2018) | Robot-assisted SEEG in Children | Single-center retrospective | Moderate | Retrospective clinical | Moderate | Moderate | Good | **Moderate** | Retrospective with variable follow-up |
| Kim et al. (2020) | Robot vs Manual SEEG | Retrospective comparative | Moderate | Retrospective clinical | Moderate | Low | Good | **Moderate** | Retrospective comparison |
| Li et al. (2023) | Frameless Robot SEEG in Hypothalamic Hamartoma | Retrospective | Moderate | Retrospective clinical | Moderate | Low | Good | **Moderate** | Retrospective design |
| Luo et al. (2024) | Robot-assisted SEEG (Case Report) | Case report | High | Case report | High | Low | Moderate | **High** | Single case report |
| Rohatgi et al. (2018) | Robotic RNS in Bitemporal Epilepsy | Technical note + case series | Moderate | Clinical case series | Moderate | Low | Moderate | **Moderate** | Small sample case series |
| Gupta et al. (2020) | Robot-assisted MRgLITT | Case study | High | Case report | High | Low | Moderate | **High** | Single case study |
| Shirozu et al. (2020) | Repeat SRT in Hypothalamic Hamartoma | Retrospective cohort | Moderate | Retrospective clinical | Moderate | Low | Good | **Moderate** | Retrospective cohort design |
| **Study (Citation)** | **Domain** | **Study Design** | **Data Source & Selection** | **Validation Method** | **Overfitting / Data Leakage Risk** | **Outcome Measurement** | **Reporting Quality** | **Overall Risk of Bias** | **Main Reason for Judgment** |
| Cohen et al. (2016) | NLP for Pediatric Epilepsy Surgery Candidacy | Methodological study | Moderate | Retrospective chart review | Moderate | Moderate | Good | **Moderate** | Methodological study |
| Piano et al. (2021) | Frameless STN-DBS | Retrospective observational | Moderate | Retrospective clinical | Moderate | Low | Good | **Moderate** | Retrospective design |
| Boutet et al. (2021) | fMRI + ML for DBS Parameter Optimization | Interventional + ML validation | Low | Prospective + ML validation | Low | Low | Good | **Low** | Prospective component with validation |
| Shao et al. (2020) | New-generation Directional DBS | Retrospective observational | Moderate | Retrospective clinical | Moderate | Low | Good | **Moderate** | Retrospective design |
| Faraji et al. (2020) | Robotic DBS Lead Implantation | Retrospective observational | Moderate | Retrospective clinical | Moderate | Low | Good | **Moderate** | Retrospective design |
| Shah et al. (2023) | Multimodal Biomarker DBS Programming | Prospective observational | Low | Prospective clinical | Low | Low | Good | **Low** | Prospective design |
| **Study (Citation)** | **Domain** | **Study Design** | **Data Source & Selection** | **Validation Method** | **Overfitting / Data Leakage Risk** | **Outcome Measurement** | **Reporting Quality** | **Overall Risk of Bias** | **Main Reason for Judgment** |
| Bronte-Stewart et al. (2025) | Long-term Adaptive DBS (aDBS) | Nonrandomized clinical trial | Low | Prospective clinical trial | Low | Low | Good | **Low** | Clinical trial design |
| Ferrea et al. (2024) | ML for DBS Quality of Life Response | Observational cohort | Moderate | Mixed retrospective/prospective | Moderate | Low | Good | **Moderate** | Observational design |
| Chen et al. (2021) | AI-enhanced MRI in STN-DBS | Comparative study | Moderate | Clinical comparative | Moderate | Low | Moderate | **Moderate** | Comparative design with limitations |
| San Luciano et al. (2021) | Thalamic DBS for Acquired Dystonia | Phase 1 clinical trial | Low | Prospective clinical trial | Low | Low | Good | **Low** | Phase 1 prospective trial |
| Ganos et al. (2022) | Lesion Network for Tics & DBS | Lesion mapping + cohort | Moderate | Retrospective (lesion + DBS cohorts) | Moderate | Moderate | Good | **Moderate** | Retrospective lesion mapping |
| Perides et al. (2020) | DBS for Pain in Childhood Dystonia | Retrospective cohort | Moderate | Retrospective clinical | Moderate | Low | Good | **Moderate** | Retrospective design |
| Goyal et al. (2021) | Implantable Percept PC DBS Device | Observational validation | Moderate | Clinical validation | Moderate | Low | Good | **Moderate** | Observational validation |
| **Study (Citation)** | **Domain** | **Study Design** | **Data Source & Selection** | **Validation Method** | **Overfitting / Data Leakage Risk** | **Outcome Measurement** | **Reporting Quality** | **Overall Risk of Bias** | **Main Reason for Judgment** |
| Alagapan et al. (2023) | SCC DBS Biomarkers in Depression | Interventional prospective | Low | Prospective clinical | Low | Low | Good | **Low** | Prospective interventional study |
| Corripio et al. (2020) | DBS in Treatment-Resistant Schizophrenia | Pilot RCT crossover | Low | Pilot randomized crossover | Low | Low | Good | **Low** | Pilot RCT design |
| Wu et al. (2022) | Deep Learning Cranial Implant Design | Framework development + clinical test | Moderate | Algorithmic + single clinical case | High | Moderate | Moderate | **High** | Primarily algorithmic development |
| Dubinski et al. (2024) | ChatGPT for Neurosurgical Documentation | Retrospective observational | Moderate | Retrospective comparison | Moderate | Low | Good | **Moderate** | Retrospective comparison study |
