# Supplementary material
Source: Research Square preprint supplement (doi:10.21203/rs.3.rs-10170559/v1)
Supplement: Supplementary file 11 [file 7b5742fcdb17e4b43cee9808.docx]

**Table 22.** Descriptive quantitative synthesis at the domain level detailing the number of studies, outcome measure of interest, summary statistic, predominant method of validation, and key observation from each of the five domains of technology.

| **Domain** | **No. of Studies** | **Key Outcome** | **Summary Statistic** | **Validation Type** | **Key Observation** |
| --- | --- | --- | --- | --- | --- |
| DL Brain Tumor Detection & Classification | 11 | Accuracy | **Median 98.6%** (Range 95.86–99.7%) | Mostly Internal | Very high reported accuracy |
| Robotic SEEG / Targeting Accuracy | 4 | Error (mm) | **Median ~1.5 mm** (Range 1.14–2.74 mm) | Mostly Clinical | Good precision achieved |
| ML for Outcome Prediction | 10 | AUC | **Median 0.80–0.86** | Mostly Retrospective | Good predictive performance |
| Robotic Epilepsy Surgery | 6 | Seizure Freedom | 48–90% (variable) | Mostly Retrospective | Promising but heterogeneous |
| DBS Innovations | 8 | Therapeutic Window / Improvement | Significantly improved in new systems | Mixed | Wider windows with directional/aDBS |
