# Supplementary material
Source: Research Square preprint supplement (doi:10.21203/rs.3.rs-10170559/v1)
Supplement: Supplementary file 12 [file 8558cc68018807107b1d0c7c.docx]

**Table 3.** Custom five-domain risk of bias assessment criteria with definitions for Low, Moderate, and High risk across data source & selection, validation method, overfitting risk, outcome measurement, and reporting quality.

| **Domain** | **Low Risk** | **Moderate Risk** | **High Risk** |
| --- | --- | --- | --- |
| **Data Source & Selection** | Prospective, consecutive, multi-center | Retrospective, single-center, defined criteria | Unclear selection or heavy exclusions |
| **Validation Method** | External validation or prospective testing | Proper internal cross-validation | Simple train/test split or no validation |
| **Overfitting / Leakage Risk** | External validation + transparent methods | Some safeguards taken | High risk (internal only, complex models, small n) |
| **Outcome Measurement** | Clear, objective, standardized | Mostly clear | Unclear or subjective |
| **Reporting Quality** | Good reporting of methods, limitations | Partial reporting | Poor reporting of key details |
| **Overall RoB** | — | — | — |
