# Supplementary material
Source: Research Square preprint supplement (doi:10.21203/rs.3.rs-10170559/v1)
Supplement: Supplementary file 13 [file 9076d5f4ce8d7dbf9ea46a28.docx]

**Table 13.** Summary of machine learning models' predictive performances for neurosurgical outcomes in terms of prediction target, optimal area under the receiver operating characteristic curve value, validation method used, and important information in each study.

| **Study** | **Prediction Target** | **Best AUC** | **Validation Type** | **Notes** |
| --- | --- | --- | --- | --- |
| Hu et al.38 (2022) | Delayed Cerebral Ischemia | **0.858** | Retrospective | Better than LR |
| Kernbach et al.14 (2025) | GBM Extent of Resection | **0.76–0.78** | External + Prospective | Human-AI improved to 0.94 |
| Guillemaud et al.44 (2025) | TLE Surgery Outcome | **0.87** | Retrospective | Novel biomarker |
| Jabal et al.42 (2025) | Poor outcome aSAH | **0.80** | Large database | Good performance |
