# Supplementary material
Source: Research Square preprint supplement (doi:10.21203/rs.3.rs-10170559/v1)
Supplement: Supplementary file 14 [file a3339a3279cbe6f55a558555.docx]

**Table 19.** Summary of the results of study characterization and their implications for 56 analyzed studies including dominant study design, validation quality, prospective data availability, risk of bias, and proportion of external validation.

| **Aspect** | **Finding** | **Implication** |
| --- | --- | --- |
| **Dominant Study Type** | Algorithm development (32%) | High innovation but limited clinical validation |
| **Validation Quality** | 57% used internal validation only | High risk of overfitting |
| **Prospective Data** | Only 12.5% were prospective/clinical trials | Limited high-quality evidence |
| **Risk of Bias** | 50% judged as High RoB | Results should be interpreted cautiously |
| **External Validation** | Only 7.1% had external validation | Major gap in the current literature |
