# Supplementary material
Source: Research Square preprint supplement (doi:10.21203/rs.3.rs-10170559/v1)
Supplement: Supplementary file 15 [file a77d1b277e529672c2a36e54.docx]

**Table 16.** Summary of important numerical results and clinical parameters obtained from DBS research that include motor improvement scores, widening of therapeutic windows, energy delivery decrease with adaptive DBS, and probability of identifying an optimal stimulation contact by means of algorithmic programming.

| **Study (Citation)** | **Key Metric** | **Value** | **Notes** |
| --- | --- | --- | --- |
| Piano et al.54 (2021) | UPDRS III improvement (1 year) | **30.1%** | Off-med, on-stim |
| Chen et al.61 (2021) | UPDRS improvement | 47.2 → **20.3** | With AI MRI processing |
| Shao et al.56 (2020) | Therapeutic Window (New vs Legacy) | Significantly larger (p=0.005 in PD) | Directional leads |
| Bronte-Stewart et al.59 (2025) | TEED Reduction (aDBS vs cDBS) | **~22 µW** reduction | Energy efficient |
| Ferrea et al.60 (2024) | Patients with QoL improvement | **~54%** | Electrode position important |
| Shah et al.58 (2023) | Probability of optimal contact | **~90%** with full lead + algorithm | Algorithmic programming |
| Boutet et al.55 (2021) | ML accuracy for optimal DBS settings | **88%** (a priori), **76%** (naïve) | fMRI biomarker |
| San Luciano et al.62 (2021) | BFMDRS Motor improvement (Dystonia) | **+21.5%** | Thalamic DBS |
