# Supplementary material
Source: Research Square preprint supplement (doi:10.21203/rs.3.rs-10170559/v1)
Supplement: Supplementary file 16 [file bce553cd5bc996ad11eb473e.docx]

**Table 18.** Summary of key conclusions drawn from risk of bias assessment within each of five technology domains for all 56 included studies with corresponding implications on interpretation of reported performance metrics and translational readiness.

| **Finding** | **Implication** |
| --- | --- |
| **50% of studies at High RoB** | Results should be interpreted with caution |
| **Validation is the weakest domain** | Most DL studies lack external validation |
| **Robotic & Clinical studies** are generally at **Moderate RoB** | More reliable than pure algorithm papers |
| **Very few Low RoB studies** | High-quality prospective, externally validated research is still limited in this field |
| **Overfitting risk is high** in DL tumor detection papers | Reported accuracies (95–99%) may be optimistic |
