# Supplementary material
Source: Research Square preprint supplement (doi:10.21203/rs.3.rs-10170559/v1)
Supplement: Supplementary file 17 [file be5f35b19a91dc88f00efb0b.docx]

**Table 10.** Summary of features of all 56 included studies, including design, type of validation, risk of bias category, and period of publication.

| **Characteristic** | **Category** | **Number (n)** | **Percentage** |
| --- | --- | --- | --- |
| **Study Design** | Algorithm Development | 18 | 32.1% |
|  | Retrospective Observational | 17 | 30.4% |
|  | Prospective / Clinical Trial | 7 | 12.5% |
|  | Others (Case series, Experimental) | 14 | 25.0% |
| **Validation Type** | Internal validation only | 32 | 57.1% |
|  | External / Prospective | 11 | 19.6% |
|  | Retrospective clinical | 13 | 23.2% |
| **Risk of Bias** | Low | 6 | 10.7% |
|  | Moderate | 22 | 39.3% |
|  | High | 28 | 50.0% |
| **Year of Publication** | 2015–2019 | 6 | 10.7% |
|  | 2020–2022 | 21 | 37.5% |
|  | 2023–2026 | 29 | 51.8% |
