# Supplementary material
Source: Research Square preprint supplement (doi:10.21203/rs.3.rs-10170559/v1)
Supplement: Supplementary file 18 [file bfca823f794041aa18448fac.docx]

**Table 14.** Targeting errors of robotics during SEEG and deep brain stimulation lead implantations along with application, target or radial error in mm, validation method, and study-specific information

| **Study** | **Application** | **Target/Radial Error** | **Validation Type** | **Notes** |
| --- | --- | --- | --- | --- |
| Kim et al.47 (2020) | SEEG (Adult) | **1.66 mm** (radial) | Retrospective | Robot vs navigated |
| Li et al.48 (2023) | SEEG (Pediatric HH) | **2.74 mm** (target) | Retrospective | Frameless |
| Faraji et al.57 (2020) | DBS Leads | **1.14 mm** (improved to 0.86 mm) | Retrospective | Learning curve effect |
