# Supplementary material
Source: Research Square preprint supplement (doi:10.21203/rs.3.rs-10170559/v1)
Supplement: Supplementary file 19 [file cd365ab935e3c48da023c3bf.docx]

| **Domain** | **Low Risk of Bias Criteria** | **Moderate Risk of Bias Criteria** | **High Risk of Bias Criteria** |
| --- | --- | --- | --- |
| **1. Data Source & Selection** | Clear, representative dataset with appropriate inclusion/exclusion; no major selection bias | Partial description or minor selection issues | Unclear/poorly described data source; significant selection bias or convenience sampling |
| **2. Validation Method** | External validation or strong prospective validation performed | Internal validation only with good practices (e.g., cross-validation) | No validation or only trivial/internal without proper techniques |
| **3. Overfitting / Leakage Risk** | Proper separation of training/test sets; no data leakage; regularization applied | Some mitigation but potential minor leakage risks | Clear evidence of overfitting, data leakage, or no mitigation strategies |
| **4. Outcome Measurement** | Objective, standardized, clinically relevant outcomes with robust measurement | Acceptable but some subjectivity or surrogate outcomes | Subjective, poorly defined, or unreliable outcome measures |
| **5. Reporting Quality** | Complete, transparent reporting (methods, results, limitations, code/data availability) | Adequate reporting with minor gaps | Incomplete reporting; key details missing; poor transparency |

**Table 2.** Five-domain risk-of-bias assessment tool that defines the criteria for Low, Moderate, and High risk levels in data sources and selection, validation methods, risks of over-fitting and data leakage, outcome measures, and reporting was created and applied to all 56 studies reviewed.
