# Supplementary material
Source: Research Square preprint supplement (doi:10.21203/rs.3.rs-10170559/v1)
Supplement: Supplementary file 20 [file d1a57920c7a747f324819992.docx]

**Table 12.** Detailed risk of bias assessment for DL brain tumor detection studies.

| **Study (Citation)** | **Data Source & Selection** | **Validation Method** | **Overfitting / Leakage Risk** | **Outcome Measurement** | **Reporting Quality** | **Overall RoB** | **Main Concern** |
| --- | --- | --- | --- | --- | --- | --- | --- |
| Ullah et al.24 (2024) | Moderate | Internal only | High | Low | Moderate | **High** | No external validation |
| Rasool et al.25 (2025) | Moderate | Internal only | High | Low | Moderate | **High** | Internal validation only |
| Ben Brahim et al.27 (2024) | Moderate | Internal only | High | Low | Good | **High** | No external validation |
| Agarwal et al.28 (2024) | Moderate | Internal + Simulation | Moderate | Low | Good | **Moderate** | Simulation-based validation |
| Ishfaq et al.29 (2025) | Moderate | Internal + Unseen test set | Moderate | Low | Good | **Moderate** | Has unseen test set |
| Ke et al.31 (2026) | Moderate | Internal only | High | Low | Good | **High** | Internal validation only |
| Srinivas et al.32 (2025) | Moderate | Internal only | High | Low | Good | **High** | Internal validation only |
| Asif et al.33 (2025) | Moderate | Internal only | High | Low | Moderate | **High** | No external validation |
| Cepeda et al.30 (2024) | Low | External + Independent cohort | Low | Low | Good | **Low** | Strongest study in group |
| **Study (Citation)** | **Data Source & Selection** | **Validation Method** | **Overfitting / Leakage Risk** | **Outcome Measurement** | **Reporting Quality** | **Overall RoB** | **Main Concern** |
| Lin et al.34 (2025) | Moderate | Internal only | High | Moderate | Moderate | **High** | Small sample, internal validation |
| **Summary** | — | — | — | — | — | **1 Low, 2 Moderate, 8 High** | Over-reliance on internal validation |
