# Supplementary material
Source: Research Square preprint supplement (doi:10.21203/rs.3.rs-10170559/v1)
Supplement: Supplementary file 21 [file d1d0d8e481b9610989e97e2e.docx]

**Table 15.** Risk of bias evaluation of clinical interventional robotic studies based on study design, source of data, blinding/objectivity, follow-up/outcome measurement and confounding control with overall risk of bias assessment and major concerns for each study.

| **Study (Citation)** | **Study Design** | **Data Source** | **Blinding / objectivity** | **Follow-up / Outcome Assessment** | **Confounding Control** | **Overall RoB** | **Main Concern** |
| --- | --- | --- | --- | --- | --- | --- | --- |
| Kim et al.47 (2020) | Retrospective comparative | Single-center | Moderate | Good | Moderate | **Moderate** | Retrospective design |
| Li et al.48 (2023) | Retrospective | Single-center | Moderate | Good | Moderate | **Moderate** | Retrospective |
| McGovern et al.46 (2018) | Retrospective | Single-center | Moderate | Moderate | Low-Moderate | **Moderate** | Variable follow-up |
| Bronte-Stewart et al.59 (2025) | Nonrandomized clinical trial | Multi-center | Moderate | Good | Moderate | **Low-Moderate** | Non-randomized but prospective |
| Piano et al.54 (2021) | Retrospective observational | Single-center | Moderate | Good | Moderate | **Moderate** | Retrospective |
| Perides et al.64 (2020) | Retrospective cohort | Multi-center | Moderate | Good | Moderate | **Moderate** | Retrospective |
| Faraji et al.57 (2020) | Retrospective observational | Single-center | Moderate | Good | Moderate | **Moderate** | Learning curve not fully adjusted in all analyses |
| **Summary** | — | — | — | — | — | **Mostly Moderate RoB** | Better than pure algorithm studies but still limited by retrospective designs |
