# Supplementary material
Source: Research Square preprint supplement (doi:10.21203/rs.3.rs-10170559/v1)
Supplement: Supplementary file 22 [file de2e985d782de1a8e42ab96c.docx]

**Table 20.** Overview of the main performance indicators in the five technologies, listing the number of research papers, range, and median/typical indicator values in each technology category.

| **Metric** | **Studies Reporting** | **Range / Values** | **Median / Typical Value** | **Notes** |
| --- | --- | --- | --- | --- |
| **DL Tumor Detection Accuracy** | 8 | 95.86% – 99.7% | **98.6%** | Mostly internal validation |
| **Robotic Targeting Error (mm)** | 3 | 1.14 – 2.74 mm | **~1.5 mm** | Good precision |
| **ML Model AUC** | 7 | 0.70 – 0.94 | **0.80 – 0.86** | Good predictive ability |
| **Seizure Freedom (selected studies)** | 4 | 48% – 90% | Variable | Depends on pathology & follow-up |
| **UPDRS Improvement (DBS)** | 2 | 30.1% – Significant reduction | — | Clinically meaningful |
| **Documentation Time Reduction** | 1 | 2.3–4.6 min vs 15–21 min | Large reduction | ChatGPT advantage |
