# Supplementary material
Source: Research Square preprint supplement (doi:10.21203/rs.3.rs-10170559/v1)
Supplement: Supplementary file 23 [file e73ff0974ff56e99727ccc0b.docx]

**Table 17.** Risk of Bias Summary Overall and Domain Wise Risk of Bias Summary for All 56 included studies, which shows the number of studies in each domain classified as low, moderate, and high risk of bias and the reasons for assigning high-risk for each domain.

| **Domain** | **Number of Studies** | **Low Risk of Bias** | **Moderate Risk of Bias** | **High Risk of Bias** | **Primary Reason for High Risk of Bias** |
| --- | --- | --- | --- | --- | --- |
| Deep Learning for Brain Tumor Detection & Classification | 11 | 1 | 2 | 8 | Predominantly internal validation only with high risk of overfitting |
| Robotic SEEG and Stereotactic Procedures | 8 | 2 | 4 | 2 | Mostly retrospective single-center studies with limited external validation |
| Machine Learning for Clinical Outcome Prediction | 10 | 1 | 5 | 4 | Limited external validation and predominantly retrospective designs |
| Deep Brain Stimulation Innovations and Adaptive Systems | 8 | 2 | 4 | 2 | Mix of prospective trials and retrospective observational studies |
| Other Technical and Algorithmic Studies | 19 | 0 | 7 | 12 | Mostly algorithm development studies relying on internal validation only |
| **Overall** | **56** | **6 (11%)** | **22 (39%)** | **28 (50%)** | High reliance on internal validation and retrospective study designs |
