# Supplementary material
Source: Research Square preprint supplement (doi:10.21203/rs.3.rs-10170559/v1)
Supplement: Supplementary file 24 [file ebe46ae4dd98b8e1c6dd27d9.docx]

**Table 7.** Distribution of validation types with percentages and risk of bias implications.

| **Validation Type** | **Number of Studies** | **Percentage** | **Risk of Bias Implication** |
| --- | --- | --- | --- |
| Internal validation only | 32 | **57.1%** | High risk of overfitting |
| Retrospective clinical | 18 | 32.1% | Moderate risk |
| Prospective / Clinical Trial | 7 | 12.5% | Low risk |
| External validation | 4 | 7.1% | Low risk |
| Cadaver / Experimental | 5 | 8.9% | Moderate risk |
