# Supplementary material
Source: Research Square preprint supplement (doi:10.21203/rs.3.rs-10170559/v1)
Supplement: Supplementary file 25 [file ed49c17d28acae4313c48c20.docx]

**Table 8.** Key characteristics of the 56 included studies including total studies, patients, most common domain, validation, and overall RoB.

| **Characteristic** | **Details** | **Number / Percentage** |
| --- | --- | --- |
| **Total Studies** | — | 56 |
| **Total Patients / Subjects** | Varied widely (algorithm studies often used public datasets) | Not pooled |
| **Most Common Domain** | Deep Learning for Brain Tumor Detection | 11 studies |
| **Most Common Validation Type** | Internal validation only | 57.1% |
| **Studies with External Validation** | — | 4 (7.1%) |
| **Prospective / Clinical Trials** | — | 7 (12.5%) |
| **Overall High Risk of Bias** | — | 50% |
